# Supplementary material for: Protein tyrosine phosphatase PTPN22 regulates IL‐1β dependent Th17 responses by modulating dectin‐1 signaling in mice
Source: PubMed Central journal article supplement (PMC5859948; doi:10.1002/eji.201747092), 2017-10-20
Supplement: NIHMS945506-supplement-Supplementary_Figures.pdf [file NIHMS945506-supplement-Supplementary_Figures.pdf]

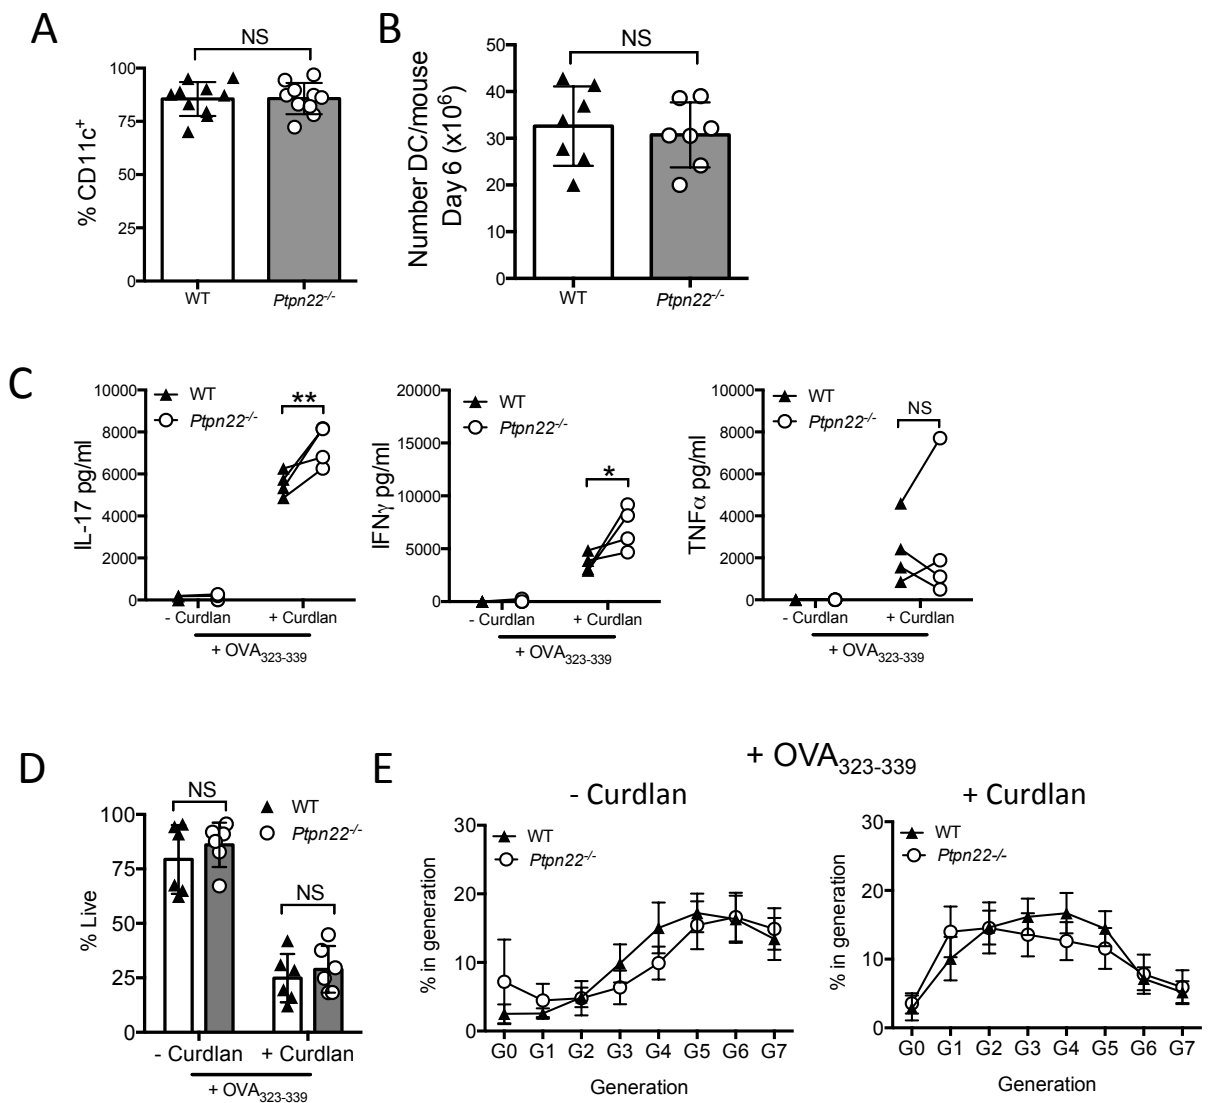

**Supplementary Figure 1. Characterisation of WT and *Ptpn22*<sup>-/-</sup> BMDC co-culture with OT-II T-cells.** WT and *Ptpn22*<sup>-/-</sup> GM-CSF derived bone marrow derived dendritic cells (BMDC) were harvested at day 6 and the proportion **(A)** and number **(B)** of CD11c<sup>+</sup> BMDC per 24 well plate determined by cell counting with trypan blue exclusion and flow cytometry. **(A-B)** Data are of >7 independent experiments. Bars represent mean  $\pm$  s.d. **(C-E)** WT and *Ptpn22*<sup>-/-</sup> BMDC were pulsed overnight with OVA<sub>323-339</sub> (50nM) in the presence or absence of curdlan (100  $\mu$ g/ml) and co-cultured with CTV labelled OT-II T-cells. **(C)** T-cells co-cultured for 6 days with WT or *Ptpn22*<sup>-/-</sup> BMDC were harvested and replated in IL-2 and IL-23 for a further 4 days. Cell-free supernatants were assessed for IL-17, IFN $\gamma$ , and TNF $\alpha$  production by immunoassay. Each point represents independent WT (closed symbols) or *Ptpn22*<sup>-/-</sup> (open symbols) BMDC preparations, each paired with OT-II T-cells; NS = not significant, \* $p$ <0.05, \*\* $p$ <0.01 by two-way ANOVA, applying Sidak's multiple comparisons test. At day 6 T-cells were either assessed for viability **(D)** and CTV dilution **(E)** by flow cytometry. **(D)** Data are of 5 independent experiments bars represent mean  $\pm$  s.d **(E)** data are mean  $\pm$  s.e.m of 10 independent experiments; NS = not significant.

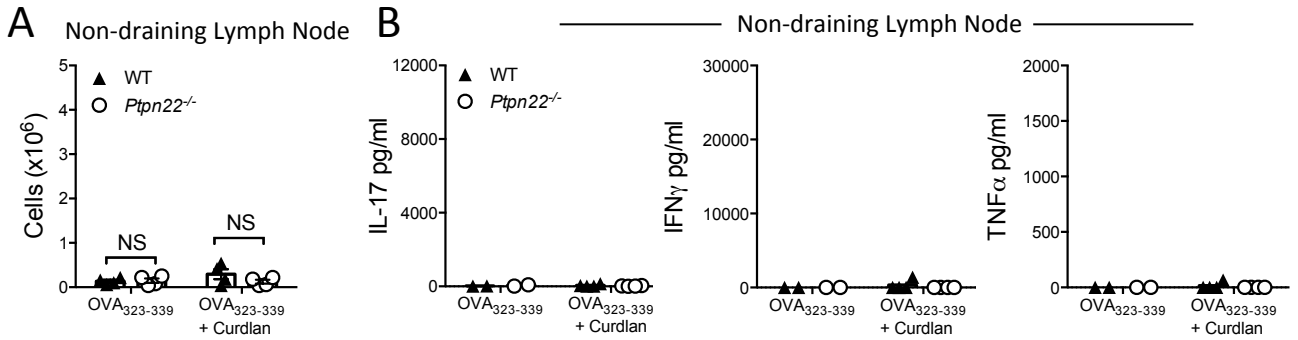

**Supplementary Figure 2. PTPN22 regulates T cell dependent IL-17 responses induced by curdlan stimulated BMDC *in vivo*.** Wild type (WT) and *Ptpn22*<sup>-/-</sup> derived bone marrow derived dendritic cells (BMDC) were pulsed overnight with OVA<sub>323-339</sub> (50nM) in the presence or absence of curdlan (100 $\mu$ g/ml). BMDC were harvested and injected into the left footpad of OT-II mice. 7 days post immunisation the non-draining and draining popliteal lymph nodes were isolated and the (A) number of cells within the non-draining lymph nodes determined. (B) Total non-draining lymph node T-cells were stimulated with immobilised anti-CD3 for 48 hours and cell-free supernatant assayed for IL-17, IFN $\gamma$  and TNF $\alpha$  by immunoassay. Data are representative of three independent experiments, each data point representing an individual OT-II mouse lymph node. Bars represent the mean  $\pm$  s.d. NS = not significant.

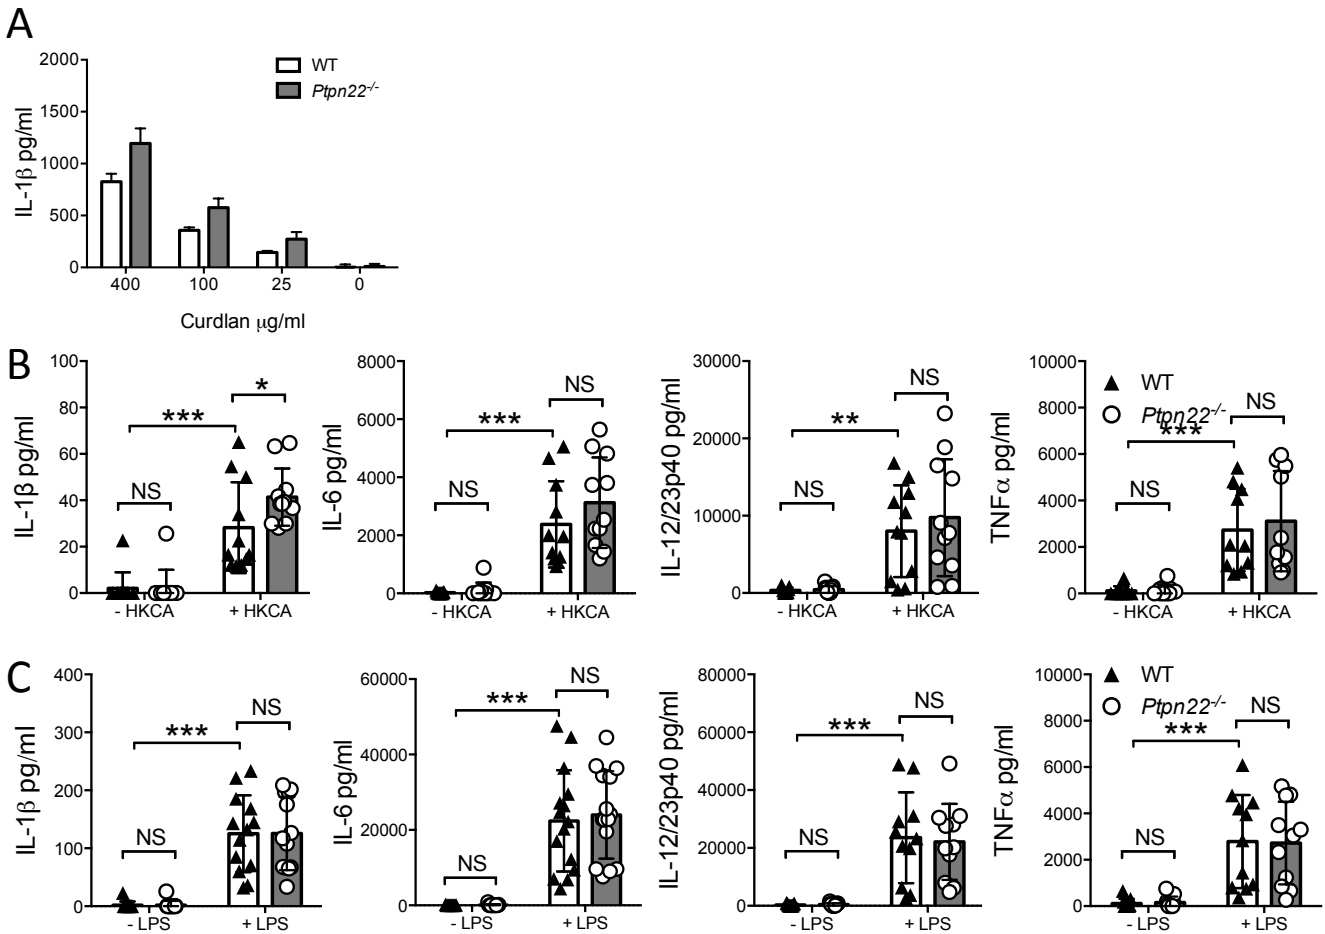

**Supplementary Figure 3. WT and *Ptpn22*<sup>-/-</sup> BMDC activation with curdlan, HKCA and LPS.** (A) WT and *Ptpn22*<sup>-/-</sup> bone marrow derived dendritic cells (BMDC) ( $1 \times 10^6$  c/ml) were stimulated for 24 hours in the presence or absence of curdlan (400, 100, or 25  $\mu\text{g/ml}$ ) and cell-free supernatants were assessed for IL-1 $\beta$ . Data are representative of 3 independent experiments, bars represent mean  $\pm$  s.d. (B, C) WT and *Ptpn22*<sup>-/-</sup> BMDC ( $1 \times 10^6$  c/ml) were stimulated for 24 hours in the presence or absence of (B) HKCA ( $6.25 \times 10^5$  c/ml) or (C) LPS (100 ng/ml). Cell-free supernatants were assessed for IL-1 $\beta$ , IL-6, IL-12/23p40, and TNF $\alpha$  by immunoassay. Data are of >10 independent experiments, bars represent mean  $\pm$  s.d.; NS = not significant, \* $p < 0.05$ , \*\* $p < 0.01$ , \*\*\* $p < 0.001$  compared with two-way ANOVA applying Sidak's multiple comparisons test.

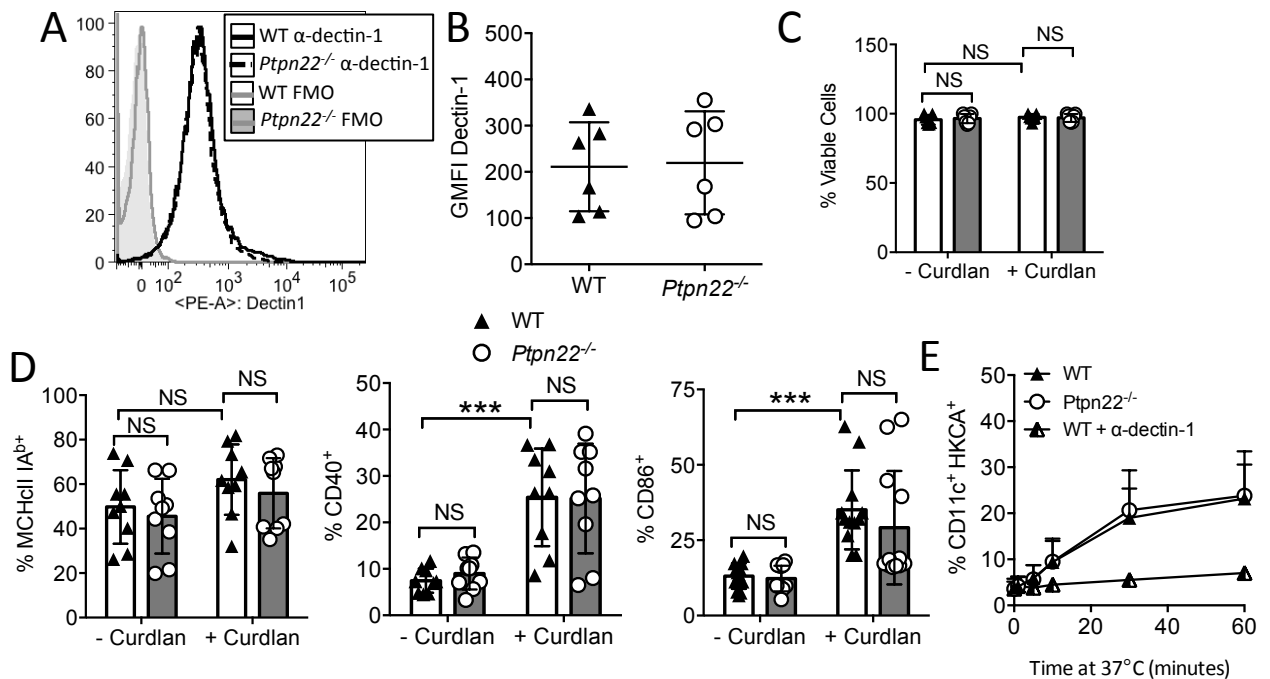

**Supplementary Figure 4. Characterisation of WT and *Ptpn22*<sup>-/-</sup> BMDC activation.** (A,B) Day 6 WT and *Ptpn22*<sup>-/-</sup> BMDC were surface stained with antibodies towards CD11c and dectin-1 and expression determined by flow cytometry. (A) Representative histogram of 1 of 6 independent experiments; solid black line WT; Broken black line *Ptpn22*<sup>-/-</sup>; Grey solid line WT FMO; Grey filled *Ptpn22*<sup>-/-</sup> FMO (B) Dectin-1 geometric mean fluorescence intensity (GMFI) data are of 6 independent experiments; line represents the mean ± s.d. (C-E) Day 6 WT and *Ptpn22*<sup>-/-</sup> BMDC were stimulated for 24 hours in the presence or absence of curdlan (100µg/ml) and stained for (C) viability dye and (D) surface markers CD11c, MHCII IA<sup>b</sup>, CD40 and CD86. Cell debris was excluded and the % of viability dye negative cells calculated. Data are of 7-9 independent experiments. Bars represent mean ± s.d. NS = not significant, \*\*\*p<0.001 compared with two-way ANOVA, applying Sidak's multiple comparison test. (E) WT and *Ptpn22*<sup>-/-</sup> BMDC or WT BMDC pre-treated with anti-dectin-1 (10ug/ml) were incubated at 37°C with UV labeled HKCA for 0-60 minutes and the percentage of CD11c<sup>+</sup>UV<sup>+</sup> cells determined by flow cytometry. WT and *Ptpn22*<sup>-/-</sup> data are of 7 independent experiments and WT +α-dectin-1 are of 3 independent experiments. Bars represent mean ± s.d.

**A**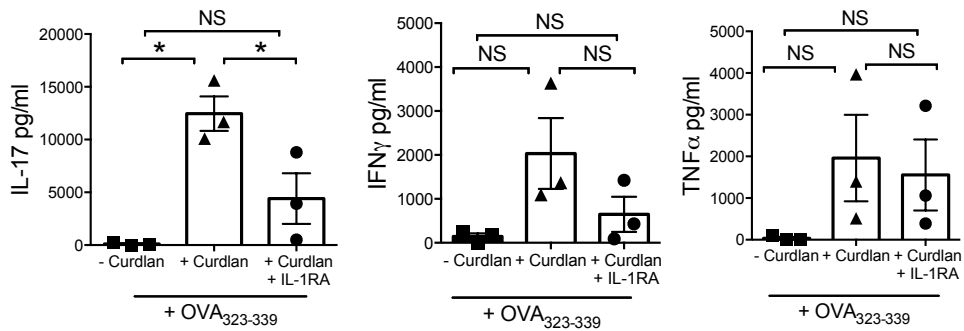**B**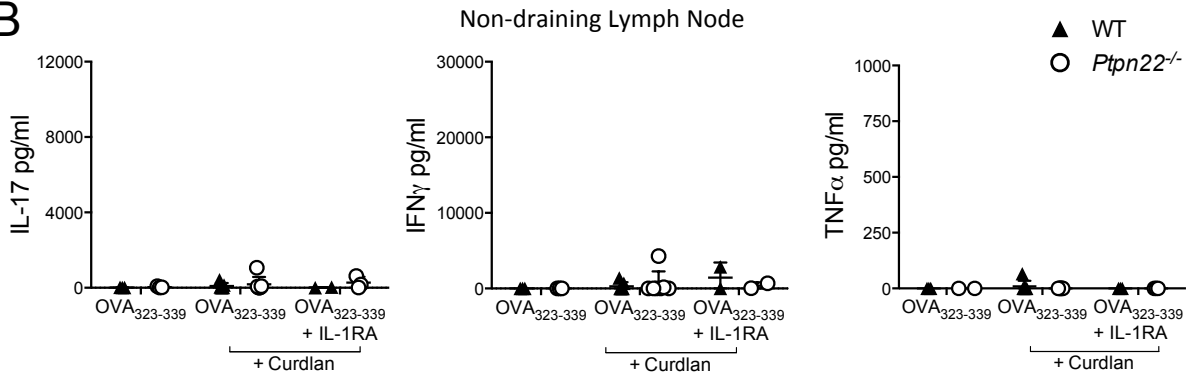

**Supplementary Figure 5. Induction of IL-17 by curdlan activated BMDC is IL-1 dependent. (A)** Day 6 bone marrow derived dendritic cells (BMDC) were pulsed overnight with OVA<sub>323-339</sub> in the presence or absence of curdlan (100 $\mu$ g/ml). BMDC were then co-cultured with OT-II T-cells for 6 days in the presence or absence of IL-1RA (0.2 $\mu$ g/ml). Cell-free supernatants were assessed for IL-17, IFN $\gamma$ , and TNF $\alpha$  by immunoassay. Data show three independent experiments, bars represent mean  $\pm$  s.d.; \*p<0.05 compared with one-way ANOVA, with Holm-Sidak's multiple comparisons test. **(B)** WT and *Ptpn22*<sup>-/-</sup> derived bone marrow derived dendritic cells (BMDC) were pulsed overnight with OVA<sub>323-339</sub> (50 nM) in the presence or absence of curdlan (100  $\mu$ g/ml). BMDC were harvested and 5x10<sup>5</sup> cells were injected into the left footpad of OT-II mice in the presence or absence of 0.5mg IL-1RA. 7 days post immunisation the non-draining (right) popliteal lymph nodes were isolated. Total non-draining lymph node T-cells were stimulated with immobilised anti-CD3 for 48 hours and cell-free supernatants assayed for IL-17, IFN $\gamma$  and TNF $\alpha$  by immunoassay. Data are representative of two independent experiments (N = 3-5 mice per group), each point representing an individual OT-II mouse lymph node. Data represent mean  $\pm$  s.d. NS = not significant, \* p<0.05, \*\*p<0.01, \*\*\*p<0.001 by two-way ANOVA, applying Sidak's multiple comparisons test.

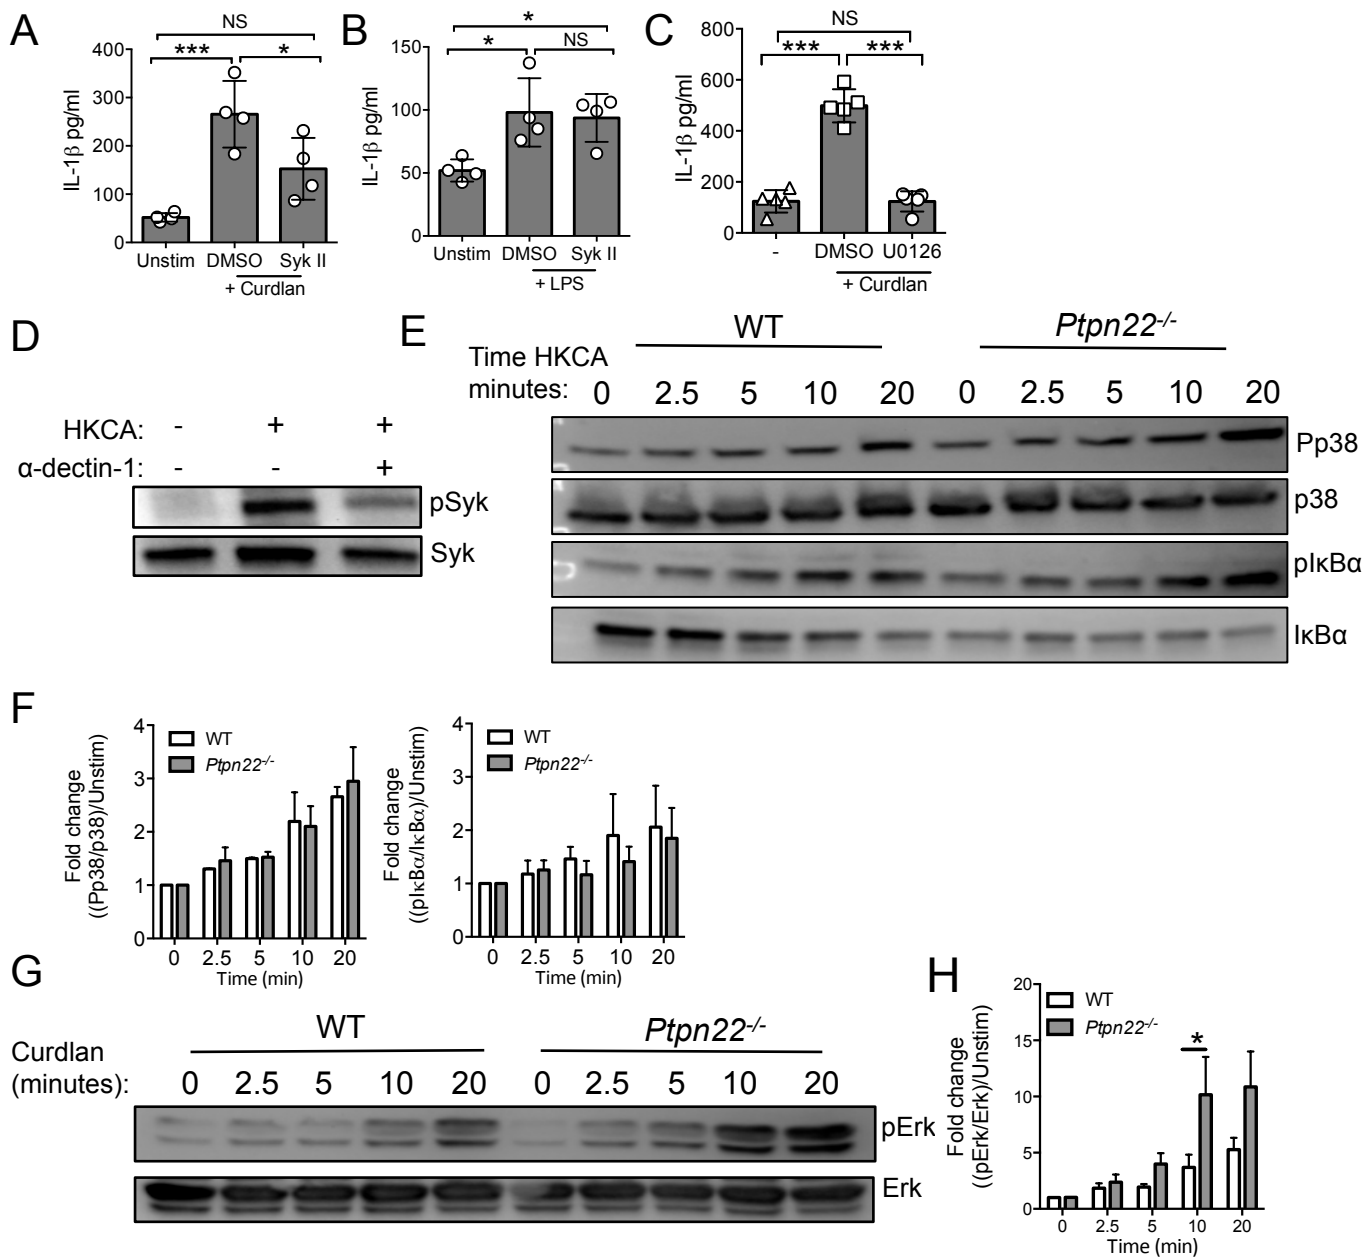

**Supplementary Figure 6. Dectin-1 induced WT and *Ptpn22*<sup>-/-</sup> BMDC signalling** Bone marrow derived dendritic cells (BMDC) were pretreated for 30 minutes with (A, B) Syk inhibitor SykII (2 $\mu$ M) or (C) MEK1/2 inhibitor U0126 (10 $\mu$ M) or DMSO and stimulated for 24 hours in the presence or absence of (A, C) curdlan (100  $\mu$ g/ml) (B) LPS 100ng/ml. Cell-free supernatants were assessed for expression of IL-1 $\beta$  by immunoassay. Data are representative of 4-5 independent experiments, presented as mean  $\pm$  s.d; NS = not significant, \*\* $p$ <0.01; \*\*\* $p$ <0.001 applying one-way ANOVA. (D) WT bone marrow derived dendritic cells (BMDC) (3 $\times$ 10<sup>6</sup> c/ml) were pretreated with anti-dectin-1 (5 $\mu$ g/ml) and stimulated for 10 minutes at 37 $^{\circ}$ C in the presence of HKCA (2.5  $\times$ 10<sup>6</sup> c/ml). Whole cell lysates were blotted for total and pSyk (E-F) WT and *Ptpn22*<sup>-/-</sup> BMDC (3 $\times$ 10<sup>6</sup> c/ml) were stimulated for 0-20 minutes at 37 $^{\circ}$ C in the presence of HKCA (6.25  $\times$ 10<sup>5</sup> c/ml). Whole cell lysates were blotted for total and Pp38 and total and plkB $\alpha$ . (E) Representative blots of 3 independent experiments (F) ImageJ quantification of band intensity. Phosphorylated protein values were normalised to total protein and the fold change to 0 min calculated. Bars represent the mean of 3 independent experiments  $\pm$  s.e.m. (G-H) WT and *Ptpn22*<sup>-/-</sup> BMDC were stimulated for 0-20 minutes at 37 $^{\circ}$ C in the presence of curdlan (100 $\mu$ g/ml). Whole cell lysates were blotted for total and pErk (G) Representative blots of 3 independent experiments (H) ImageJ quantification of band intensity. Phosphorylated protein values were normalised to total protein and the fold change to 0 min calculated. Bars represent the mean of 3 independent experiments  $\pm$  s.e.m.; \* $p$ <0.05 compared with two-way ANOVA, applying Sidak's multiple comparison test.

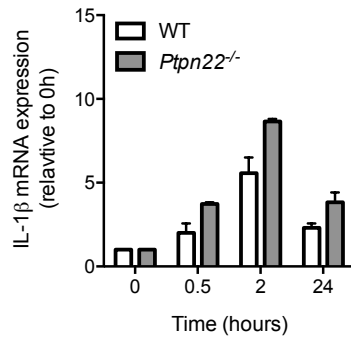

**Supplementary Figure 7. Curdlan induced IL-1 $\beta$  transcription. (A)** WT and *Ptpn22*<sup>-/-</sup> bone marrow derived dendritic cells (BMDC) were stimulated for 0-24h at 37°C in the presence of curdlan (10  $\mu$ g/ml). Expression of IL-1 $\beta$  was determined by real-time PCR and normalised to expression of 18S and IL-1 $\beta$  expression at 0h. Bars represent the mean of triplicate values representative of 3 independent experiments  $\pm$  s.d.
